# Supplementary material for: A sustainable aviation fuel pathway from biomass: life cycle environmental and cost evaluation for dimethylcyclooctane jet fuel
Source: Royal Society of Chemistry journal article supplement (doi:10.1039/d3se01470c), 2024-01-01
Supplement: d3se01470c2.pdf [file d3se01470c2.pdf]

## SUPPORTING INFORMATION

The supporting information consists of 5 pages, including cover page, containing 3 figures and 7 tables.

### Environmental and Cost Evaluation of Lignocellulosic Path to Sustainable Aviation Fuel

*Rahamim Batten<sup>†</sup>, Mukund Karanjikar<sup>‡</sup>, Sabrina Spatari<sup>†\*</sup>*

<sup>†</sup>Affiliation 1: Faculty of Civil and Environmental Engineering, Technion – Israel Institute of Technology, Haifa, Israel, 3200003; rahamimb@campus.technion.ac.il

<sup>‡</sup>Affiliation 2: Technology Holding LLC, Salt Lake City, Utah, 84119 USA; mukund@tekholding.com  
Correspondence: [ssabrina@technion.ac.il](mailto:ssabrina@technion.ac.il);

Keywords. DMCO; life cycle assessment; fermentation; techno-economic analysis; agricultural residues; circular economy

## SUPPORTING FIGURES

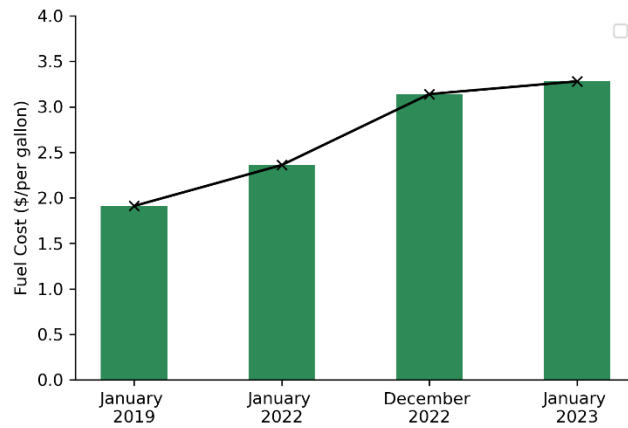

Figure S1. Petroleum Jet Fuel price January 2019-2023 [1]

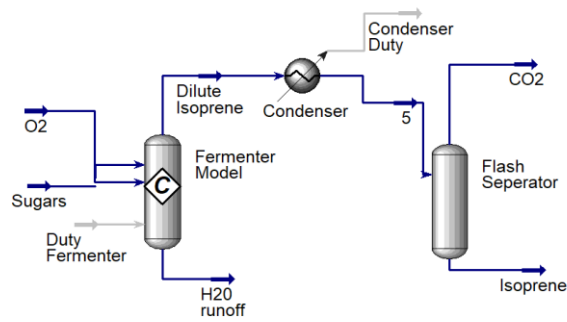

Figure S2. PFD of UniSim Fermentation Modeling Area\*

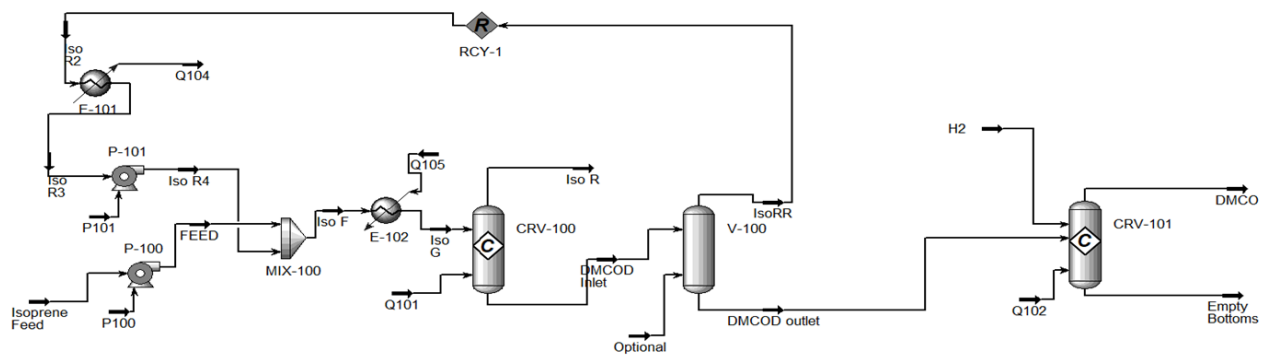

Figure S3. PFD of Catalytic Upgrading and Hydrogenation Modeling Area\*

\*The UniSim files can be made available on request

## SUPPORTING TABLES

**Table S1.** Energy requirements for conversion of fermentable sugars in biomass to DMCO

|                                 |         |                             |
|---------------------------------|---------|-----------------------------|
| <b>Fermentation Heat Duty</b>   | 1708    | kJ/kg of isoprene produced  |
| <b>Condenser Duty</b>           | 87.3    | kJ/kg of isoprene recovered |
| <b>Recirculation pumps</b>      | 0.001   | kJ/s per pump               |
| <b>Dimerization</b>             | -3413.9 | kJ/kg isoprene              |
| <b>Dehydration reactor duty</b> | 1.5     | kJ/kg of MBE fed            |
| <b>Hydrogenation pre-heat</b>   | 0.4     | kJ/kg isoprene              |
| <b>Hydrogenation Duty</b>       | 385.5   | kJ/kg isoprene              |

**Table S2.** Life cycle inventory input data for corn stover based DMCO (per 1 kg isoprene)

| <b>Item</b>                | <b>Amount</b>                | <b>Unit</b>        | <b>Source and assumptions</b>                                                                                                                                                                 |
|----------------------------|------------------------------|--------------------|-----------------------------------------------------------------------------------------------------------------------------------------------------------------------------------------------|
| <i>Upstream</i>            |                              |                    |                                                                                                                                                                                               |
|                            |                              |                    | Emissions due to corn stover harvest and replacement of nutrients are allocated to the corn stover and emissions from nutrient inputs for crop production are allocated to the corn crop      |
| Feedstock input            | 6.5                          | kg                 | Calculated based on our model and conversions of different stages                                                                                                                             |
| Feedstock yield            | 9.7                          | ton/ha/yr          | Spatari et al.[2]                                                                                                                                                                             |
| Collection                 | 1.7                          | MJ                 | Using data from Spatari et al.[2] and Pourhashem et al.[3]                                                                                                                                    |
| Nutrient replacement       | N 33<br>P 11.9<br>K 60.7     | g                  | Based on GREET results from Spatari et al.[2] for nutrient replacement due to corn stover removal                                                                                             |
| N <sub>2</sub> O emissions | Direct: 0.3<br>Indirect: 0.4 | g                  | Based on DayCent model[4] results from Adler et al.[5] and Pourhashem et al.[3]                                                                                                               |
| Change in soil carbon      | 1.2                          | kg CO <sub>2</sub> | Based on DayCent model[4] results from Adler et al.[5] and Pourhashem et al.[3]                                                                                                               |
| Diesel for transportation  | 30.7                         | ml                 | Assuming 80 km transportation distance including the return trip and using diesel powered truck from the USLCI database in SimaPro[6] software                                                |
| <i>Biorefinery</i>         |                              |                    |                                                                                                                                                                                               |
| Fermentation energy        | 898.9                        | KJ                 | Calculated required amount of energy and chemicals using UniSim[7] simulation and using Ecoinvent database[8] for life cycle impact assessment                                                |
| Heat Duty Fermenter        | 7.88                         | KJ                 | Energy needed to raise the Temperature of reactor, including 1L of water. 2.67g isoprene/ 3.74 g of sugars –UniSim Simulation Model                                                           |
| Recirculation Pumps        | 0.001                        | kJ/s               | Fermenter recirculation pumps per pump [9]                                                                                                                                                    |
| Air Compressor             | 0.004                        | kWh                | UniSim Simulation Model<br>1.247 kJ/hr /3600 to convert to kW then * 2.86hrs for 1kg isoprene                                                                                                 |
| Separation cooling energy  | -1938.8                      | KJ                 | UniSim Simulation Model                                                                                                                                                                       |
| Separation heating energy  | 2068.9                       | KJ                 | UniSim Simulation Model                                                                                                                                                                       |
| Dimerization energy        | -3413.9                      | KJ                 | UniSim Simulation Model                                                                                                                                                                       |
| Hydrogenation energy       | 385.5                        | KJ                 | UniSim Simulation Model                                                                                                                                                                       |
| Surplus electricity        | 8742                         | KJ                 | Difference between the total electricity generated onsite from lignin combustion in the boiler and the electricity required by the bioplant; assumed to replace from the MRO electricity grid |

**Table S3.** Cost contribution of various sections to the Minimum Fuel selling price (MFSP) for the DMCO and electricity. All cost in \$/L DMCO.

| AREA                                         | Capital Recovery Charge | Raw Materials & Waste | Process Electricity | Grid Electricity | Total Plant Electricity | Fixed Costs | Area Totals |
|----------------------------------------------|-------------------------|-----------------------|---------------------|------------------|-------------------------|-------------|-------------|
| <b>Feedstock and Handling</b>                | \$0.000                 | \$0.364               | \$0.000             | \$0.000          | \$0.000                 | \$0.000     | \$0.364     |
| <b>Pretreatment and Conditioning</b>         | \$0.055                 | \$0.048               | \$0.014             | \$0.000          | \$0.000                 | \$0.012     | \$0.129     |
| <b>Enzymatic Hydrolysis and Fermentation</b> | \$0.035                 | \$0.008               | \$0.007             | \$0.000          | \$0.000                 | \$0.007     | \$0.057     |
| <b>Cellulase Enzyme Production</b>           | \$0.021                 | \$0.306               | \$0.013             | \$0.000          | \$0.000                 | \$0.004     | \$0.345     |
| <b>Distillation and Solids Recovery</b>      | \$0.020                 | \$0.000               | \$0.005             | \$0.000          | \$0.000                 | \$0.004     | \$0.030     |
| <b>Wastewater Treatment</b>                  | \$0.075                 | \$0.027               | \$0.018             | \$0.000          | \$0.000                 | \$0.016     | \$0.136     |
| <b>Storage</b>                               | \$0.008                 | \$0.000               | \$0.000             | \$0.000          | \$0.000                 | \$0.002     | \$0.010     |
| <b>Boiler and Turbogenerator</b>             | \$0.110                 | \$0.029               | \$0.003             | -\$0.034         | -\$0.069                | \$0.023     | \$0.063     |
| <b>Utilities</b>                             | \$0.012                 | \$0.004               | \$0.008             | \$0.000          | \$0.000                 | \$0.002     | \$0.025     |
| <b>NET SUMMATION</b>                         | \$0.336                 | \$0.786               | \$0.069             | -\$0.034         | -\$0.069                | \$0.070     | \$1.159     |

**Table S4.** CAPEX in year 2018 with changes to NREL's Model 2015 according to process steps. All cost in USD\$.

| Area          | EQUIPMENT TITLE                            | DESCRIPTION                                  | \$          | Year of Quote | Purch Cost in Base Yr | Scaling Val | Units | Scaling Exp | Inst Factor | Scaled Purch Cost | Purch Cost in Proj year | Inst Cost in Proj year | Remarks                                  |
|---------------|--------------------------------------------|----------------------------------------------|-------------|---------------|-----------------------|-------------|-------|-------------|-------------|-------------------|-------------------------|------------------------|------------------------------------------|
| Fermentation  | ISOPRENE FERMENTER (Bioconversion reactor) | Total Vessel Volume: 3785 m <sup>3</sup>     | \$7,792,000 | 2017          | \$7,792,000           | 1           | ea    | 1.00        | 0.5         | \$7,792,000       | \$8,280,802             | \$4,140,401            | UniSim Model and Humbird et al. 2017[11] |
|               | ISOPRENE CONDENSER                         | Shell and tube                               | \$718,084   | 2017          | \$718,084             | 1           | ea    | 1.00        | 1.5         | \$718,084         | \$763,131               | \$1,144,696            | UniSim model and Excel costing [10]      |
|               | Isoprene Transfer Pump                     | 2153 GPM, 171 FT TDH                         | \$214,400   | 2010          | \$214,400             | 18833       | kg/hr | 0.80        | 2.3         | \$417,452         | \$457,091               | \$1,051,309            | Goulds [12]                              |
|               | Fermenter Air Compressor Package           | 8000 SCFM @ 16 psig                          | \$350,000   | 2009          | \$350,000             | 33168       | kg/hr | 0.60        | 1.6         | \$346,282         | \$400,158               | \$640,253              | Dresser Roots [12]                       |
| Dimerization  | Dimerization Reactor                       |                                              | \$3,485,301 | 2017          |                       |             | kg/hr | 1.00        | 1.5         | \$3,485,301       | \$3,703,939             | \$5,555,908            | UniSim model and Excel costing [10]      |
|               | Hydrogen recovery unit                     |                                              | \$993,634   | 2018          |                       |             | kg/hr | 1.00        | 1.5         | \$993,634         | \$993,634               | \$1,490,451            | Baral et al. 2021[13]                    |
|               | Catalyst recovery unit                     |                                              |             |               |                       |             | kg/hr | 1.00        | 1.5         | \$0               |                         | \$0                    | Assumed in OPEX costs                    |
|               | Flash separator                            |                                              | \$43,129    | 2018          |                       |             | kg/hr | 1.00        | 1.5         | \$43,129          | \$43,129                | \$64,693               | Excel costing[10]                        |
| Hydrogenation | Hydrogenation reactor                      | (Q3 FY17 milestone), base PF=2.5, 208 BBL/hr | \$4,168,568 | 2011          | \$4,168,568           | 32895       | L/hr  | 0.70        | 2.0         | \$2,194,971       | \$2,194,971             | \$4,389,943            | UniSim model and Excel costing [10]      |
|               | Hydrogen compressor                        | 25.3 kW                                      | \$87,283    | 2018          |                       |             | kg/hr | 1.00        | 1.5         | \$87,283          | \$87,283                | \$130,924              | Excel Costing [10]                       |

**Table S5. Variable OPEX year 2018 USD (indexed) with changes to NREL's Model 2015 according to process steps.**

| Area                                               | Raw Material                   | kg/hr   | lb/hr   | Quoted Price (cents / ton) | Year of Price Quote | 2018 Cost (\$ / ton) | 2018 Cost (\$/lb) | \$/hour   | MMS/yr (2018) | Cents/Gallon DMCO (2018) | Remarks - Cost reference                                                                                         |
|----------------------------------------------------|--------------------------------|---------|---------|----------------------------|---------------------|----------------------|-------------------|-----------|---------------|--------------------------|------------------------------------------------------------------------------------------------------------------|
| <b>Feedstock and Handling</b>                      | Feedstock                      | 104,167 | 229,688 | 5701                       | 2018                | 57.01                | 0.03              | 6,547.01  | 55.06         | 134.77                   |                                                                                                                  |
|                                                    | Sulfuric Acid, 93%             | 1,500   | 3,308   | 9000                       | 2009                | 116.18               | 0.06              | 192.14    | 1.62          | 3.96                     | Basic Chemical, Omaha via HGI                                                                                    |
| <b>Pretreatment and Conditioning</b>               | Ammonia                        | 1,051   | 2,317   | 45000                      | 2009                | 580.92               | 0.29              | 673.01    | 5.66          | 13.85                    | Terra Industries via HGI, anhydrous, delivery to Iowa                                                            |
|                                                    | CSL                            | 580     | 1,278   | 5700                       | 2009                | 73.58                | 0.04              | 47.02     | 0.40          | 0.97                     | Corn Products via HGI                                                                                            |
| <b>Enzymatic Hydrolysis and Fermentation</b>       | DAP                            | 19      | 42      | 99000                      | 2009                | 1278.02              | 0.64              | 26.86     | 0.23          | 0.55                     | Ronas Chemicals via HGI                                                                                          |
|                                                    | Sorbitol                       | 44      | 98      | 113000                     | 2009                | 1458.75              | 0.73              | 71.36     | 0.60          | 1.47                     | Coast Southwest via HGI                                                                                          |
|                                                    | Purchased Enzyme               | 0       | 0       | 0                          | 2018                | 0.00                 | 0.00              | 0.00      | 0.00          | 0.00                     | Not considered in NREL Davis et al. 2015                                                                         |
| <b>Cellulase Enzyme Production</b>                 | Glucose                        | 2,418   | 5,332   | 58220                      | 2009                | 751.58               | 0.38              | 2,003.56  | 16.85         | 41.24                    | USDA                                                                                                             |
|                                                    | Tryptone                       | 164     | 363     | 5700                       | 2009                | 73.58                | 0.04              | 13.34     | 0.11          | 0.27                     | Corn Products via HGI                                                                                            |
|                                                    | Ammonia                        | 115     | 254     | 45000                      | 2009                | 580.92               | 0.29              | 73.64     | 0.62          | 1.52                     | Terra Industries via HGI, anhydrous, delivery to Iowa                                                            |
|                                                    | Host nutrients                 | 67      | 149     | 74530                      | 2007                | 1063.88              | 0.53              | 79.00     | 0.66          | 1.63                     | SRI CEH                                                                                                          |
|                                                    | Dimerization catalyst          | 24      | 54      | 930582                     | CatCost NREL        | 9305.82              | 4.65              | 251.19    | 2.11          | 5.17                     | Baral et al 2021 (\$10.26 \$/kg - 0.13%wt) and Isoprene feed (18833kg/hr) dual pathway                           |
| <b>Catalytic conversion, upgrading and storage</b> | Hydrogenation catalyst         | 81      | 179     | 1315150                    | CatCost NREL        | 13151.50             | 6.58              | 1,174.20  | 9.88          | 24.17                    | Baral et al 2021 (\$14.5 \$/kg - 0.43%wt) and DMCOD feed (18833kg/hr) dual pathway                               |
|                                                    | Hydrogen production            | 417     | kg/h    | 4.49                       | \$/kg               |                      |                   | 1,870.83  | 15.73         | 38.51                    | Title: Hydrogen Production Cost Using Low-Cost Natural Gas Originator: Sara Dillich, Todd Ramsden & Marc Melaina |
|                                                    | Hydrogen recovery cost         | 69      | kmol/h  | 0.50                       | \$/kmol             |                      |                   | 34.43     | 0.29          | 0.71                     | Minimum H2 req for dry feed                                                                                      |
| <b>Wastewater Treatment</b>                        | Sulfur Dioxide                 | 16      | 36      | 25400                      | 2005                | 393.54               | 0.20              | 7.12      | 0.06          | 0.15                     | Hydrogen management in refineries Rabie and excel Hydrogen calculation                                           |
|                                                    | Caustic (as pure)              | 2,252   | 4,966   | 15000                      | 2009                | 193.64               | 0.10              | 480.77    | 4.04          | 9.90                     | SRI CEH                                                                                                          |
|                                                    | Boiler Chems                   | 0       | 1       | 280000                     | 1991                | 6469.43              | 3.23              | 1.76      | 0.01          | 0.04                     |                                                                                                                  |
| <b>Combustor, boiler, and turbo-generator</b>      | FGD Lime                       | 894     | 1,972   | 20000                      | 2009                | 258.19               | 0.13              | 254.60    | 2.14          | 5.24                     |                                                                                                                  |
|                                                    | Feedstock                      | 0       | 0       | 5701                       | 2018                | 57.01                | 0.03              | 0.00      | 0.00          | 0.00                     | Set in Cell I20                                                                                                  |
| <b>Utilities</b>                                   | Cooling Tower Chems            | 2       | 5       | 200000                     | 1999                | 3877.09              | 1.94              | 10.19     | 0.09          | 0.21                     |                                                                                                                  |
|                                                    | Makeup Water                   | 147,136 | 324,435 | 20                         | 2004                | 0.34                 | 0.00              | 54.40     | 0.46          | 1.12                     | Peters & Timmerhaus                                                                                              |
| <b>Waste Streams</b>                               | Disposal of Ash                | 5,724   | 12,622  | 1820                       | 1993                | 41.20                | 0.02              | 259.99    | 2.19          | 5.35                     |                                                                                                                  |
| <b>By-Products and Credits</b>                     | Grid Electricity               | 12,814  | kW      | by year                    | 2018                | \$/kWh               | 0.04              | 572.02    | 4.81          | 11.77                    |                                                                                                                  |
|                                                    | Area 100 Electricity           | 859     | kW      | by year                    | 2018                | \$/kWh               | 0.04              | 38.37     | 0.32          | 0.79                     |                                                                                                                  |
|                                                    | Lubricant                      | 0       | kg/h    | 1.2000                     | \$/kg               |                      |                   | 0.00      | 0.00          | 0.00                     |                                                                                                                  |
|                                                    | Total Variable Operating Costs |         |         |                            |                     |                      |                   | 13,461.65 | 113.67        | 278.22                   |                                                                                                                  |

**Table S6. Fixed OPEX in year 2018 with changes to NREL's Model 2015 according to process steps. All cost in USD\$.**

|                                | Position                    | Salary | Year of salary quote | 2018 Salary | # Required | Total   | 2018 Cost USD\$ |           |
|--------------------------------|-----------------------------|--------|----------------------|-------------|------------|---------|-----------------|-----------|
| <b>Labor &amp; Supervision</b> | Plant Manager               | 147000 | 2009                 | 184,366     | 1          | 147,000 | 184,366         |           |
|                                | Plant Engineer              | 70000  | 2009                 | 87,793      | 2          | 140,000 | 175,586         |           |
|                                | Maintenance Supervisor      | 57000  | 2009                 | 71,489      | 1          | 57,000  | 71,489          |           |
|                                | Maintenance Tech            | 40000  | 2009                 | 50,167      | 12         | 480,000 | 602,010         |           |
|                                | Lab Manager                 | 56000  | 2009                 | 70,234      | 1          | 56,000  | 70,234          |           |
|                                | Lab Technician              | 40000  | 2009                 | 50,167      | 2          | 80,000  | 100,335         |           |
|                                | Lab Tech-Enzyme             | 40000  | 2009                 | 50,167      | 2          | 80,000  | 100,335         |           |
|                                | Shift Supervisor            | 48000  | 2009                 | 60,201      | 4          | 192,000 | 240,804         |           |
|                                | Shift Operators             | 40000  | 2009                 | 50,167      | 20         | 800,000 | 1,003,350       |           |
|                                | Shift Oper-Enzyme           | 40000  | 2009                 | 50,167      | 8          | 320,000 | 401,340         |           |
|                                | Yard Employees              | 28000  | 2009                 | 35,117      | 4          | 112,000 | 140,469         |           |
|                                | Clerks & Secretaries        | 36000  | 2009                 | 45,151      | 3          | 108,000 | 135,452         |           |
|                                | Total Salaries              |        |                      |             |            |         | 2,572,000       | 3,225,769 |
|                                | Labor Burden (90%)          |        |                      |             |            |         | 2,314,800       | 2,903,193 |
| <b>Other Overhead</b>          | Maintenance                 | 3.0%   | of ISBL              |             |            |         | 2,699,254       |           |
|                                | Property Insur. & Tax       | 0.7%   | of FCI               |             |            |         | 3,067,839       |           |
|                                | Total Fixed Operating Costs |        |                      |             |            |         | 11,896,055      |           |

**Table S7.** GHG intensity of DMCO as compared to Fuel Conversion Technology pathways: ATJ, HEFA Fuels, FT Synthesis, STJ Catalytic Upgrading, STJ Direct Sugar Biological to Hydrocarbons and Fast Pyrolysis.

| # | Fuel Conversion Technology                  | Feedstocks                                      | Fuel Density (g/ml) | GHG Intensity (gCO <sub>2</sub> /MJ) | References                                                   |
|---|---------------------------------------------|-------------------------------------------------|---------------------|--------------------------------------|--------------------------------------------------------------|
| 1 | Alcohol-to-Jet (ATJ)                        | Starch crops                                    | 0.59 to 0.79        | -27 to 78                            | Han (2017) [14], Gollakota (2021)[15]                        |
|   |                                             | Switchgrass                                     | 0.59 to 0.79        | 12 to 90                             | Staples (2014)[16]                                           |
|   |                                             | Poplar                                          | 0.59 to 0.79        | 32 to 73                             | Budsberg(2016)[17]                                           |
|   |                                             | Sugarcane, molasses                             | 0.59 to 0.79        | -27 to 21                            | Tanzil (2022)[18] Staples et al (2014)[16]                   |
| 2 | HEFA fuels                                  | Microalgae oil                                  | 0.77 to 0.84        | 27 to 38                             | Cox (2014)[19]                                               |
|   |                                             | Camelina oil                                    | 0.77 to 0.84        | 3 to 53                              | Stratton (2011)[20] Jong (2017)[21]                          |
|   |                                             | Jatropha oil                                    | 0.77 to 0.84        | 33 to 40                             | Bailis (2010)[22]                                            |
|   |                                             | Waste oils                                      | 0.77 to 0.84        | 17 to 21                             | Seber (2014)[23]                                             |
|   |                                             | Animal fats                                     | 0.77 to 0.84        | 26 to 84                             | Seber (2014)[23]                                             |
| 3 | FT Synthesis                                | Camelina oil                                    | 0.79 to 0.81        | 22                                   | Shonnard (2010)[24]                                          |
|   |                                             | Lignocellulose biomass, municipal waste         | 0.79 to 0.81        | -2 to 62                             | Jong (2017)[21] Suresh (2018)[25]                            |
| 4 | Sugar to Jet (STJ) Catalytic Upgrading      | Lignocellulose biomass                          | 0.77 to 0.84        | 18 to 61                             | Riazi (2018)[26] Baral (2021)[13]                            |
| 5 | STJ Direct Sugar Biological to Hydrocarbons | Sugarcane, starch crops, lignocellulose biomass | 0.77 to 0.84        | 22 to 80                             | Han (2017)[14] Cox (2014)[19]                                |
| 6 | Fast pyrolysis + upgrading                  | Equine waste                                    | Up to 0.91          | 10 to 70                             | Sorunmu (2017)[27] Elkasabi (2020)[28] Fitriasari (2023)[29] |

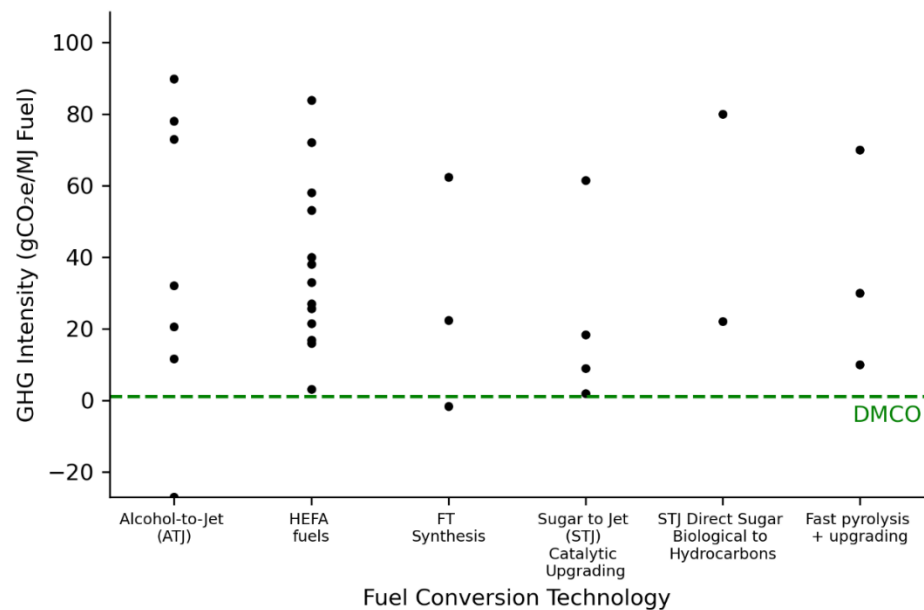

Sample calculation for jet-fuel credit

Calculate the GHG emissions per liter of fuel for jet A fuel:

GHG emissions per liter of jet fuel =  $89 \text{ gCO}_2/\text{MJ} \times 33 \text{ MJ/L} \approx 2950 \text{ gCO}_2/\text{L}$

Equivalent GHG emissions per liter of DMCO =  $89 \text{ gCO}_2/\text{MJ} \times 36.3 \text{ MJ/L} \approx 3230 \text{ gCO}_2/\text{L}$

Savings in GHG emissions per liter =  $2945.9 \text{ gCO}_2/\text{L} - 3230.7 \text{ gCO}_2/\text{L} \approx -284.8 \text{ gCO}_2/\text{L}$

Savings in GHG emissions per MJ DMCO =  $\frac{-284.8 \text{ gCO}_2/\text{L}}{36.2 \text{ MJ/L}} = 7.9$

| <b>Fuel Type</b>                                | <b>Net Heat of Combustion (MJ/L)</b> | <b>GHG Emissions (gCO<sub>2</sub>/L)</b> | <b>Difference in GHG Emissions (gCO<sub>2</sub>/L)</b> | <b>Savings per MJ (gCO<sub>2</sub>/MJ)</b> |
|-------------------------------------------------|--------------------------------------|------------------------------------------|--------------------------------------------------------|--------------------------------------------|
| Conventional Jet Fuel (89 gCO <sub>2</sub> /MJ) | 33.1                                 | 2945.9                                   | -                                                      | -                                          |
| DMCO (eq.)                                      | 36.2                                 | 3230.7                                   | 284.8                                                  | 7.9                                        |

## References

- [1] “U.S. Airlines’ January 2023 Fuel Cost per Gallon Up 4.3% from December 2022; Aviation Fuel Consumption Down 0.7% from Pre-Pandemic January 2019 | Bureau of Transportation Statistics.” [Online]. Available: <https://www.bts.gov/newsroom/us-airlines-january-2023-fuel-cost-gallon-43-december-2022-aviation-fuel-consumption-down>. [Accessed: 09-Nov-2023].
- [2] S. Spatari, D. M. Bagley, and H. L. MacLean, “Life cycle evaluation of emerging lignocellulosic ethanol conversion technologies,” *Bioresour. Technol.*, vol. 101, no. 2, pp. 654–667, Jan. 2010.
- [3] G. Pourhashem, P. R. Adler, A. J. McAloon, and S. Spatari, “Cost and greenhouse gas emission tradeoffs of alternative uses of lignin for second generation ethanol,” *Environ. Res. Lett.*, vol. 8, no. 2, 2013.
- [4] W. J. Parton, M. Hartman, D. Ojima, and D. Schimel, “DAYCENT and its land surface submodel: Description and testing,” *Glob. Planet. Change*, vol. 19, no. 1–4, pp. 35–48, Dec. 1998.
- [5] P. R. Adler *et al.*, “Legacy effects of individual crops affect N<sub>2</sub>O emissions accounting within crop rotations,” *GCB Bioenergy*, vol. 10, no. 2, pp. 123–136, Feb. 2018.
- [6] T. N. Pre Consultants, “SimaPro 8.4,” 2018.
- [7] Honeywell, “UniSim Process Design Suite.” 2021.
- [8] G. Wernet, C. Bauer, B. Steubing, J. Reinhard, E. Moreno-Ruiz, and B. Weidema, “The ecoinvent database version 3 (part I): overview and methodology,” *Int. J. Life Cycle Assess.*, vol. 21, no. 9, pp. 1218–1230, 2016.
- [9] J. R. Kwiatkowski, A. J. McAloon, F. Taylor, and D. B. Johnston, “Modeling the process and costs of fuel ethanol production by the corn dry-grind process,” *Ind. Crops Prod.*, vol. 23, no. 3, pp. 288–296, May 2006.
- [10] W. D. Seider, D. R. Lewin, J. D. Seader, S. Widagdo, R. Gani, and K. M. Ng, “Product and Process Design Principles - Synthesis, Analysis and Evaluation 4th ed,” p. 775, 2016.
- [11] D. Humbird, R. Davis, and J. D. McMillan, “Aeration costs in stirred-tank and bubble column bioreactors,” *Biochem. Eng. J.*, vol. 127, pp. 161–166, 2017.
- [12] R. Davis *et al.*, “Process Design and Economics for the Conversion of Lignocellulosic Biomass to Hydrocarbon Fuels and Coproducts: 2018 Biochemical Design Case Update: Biochemical Deconstruction and Conversion of Biomass to Fuels and Products via Integrated Biorefinery Path,” *Renew. Energy*, no. November, p. 147, 2018.
- [13] N. R. Baral *et al.*, “Production Cost and Carbon Footprint of Biomass-Derived Dimethylcyclooctane as a High-Performance Jet Fuel Blendstock,” *ACS Sustain. Chem. Eng.*, vol. 9, no. 35, pp. 11872–11882, Sep. 2021.
- [14] J. Han, L. Tao, and M. Wang, “Well-to-wake analysis of ethanol-to-jet and sugar-to-jet pathways,” *Biotechnol. Biofuels* 2017 101, vol. 10, no. 1, pp. 1–15, Jan. 2017.
- [15] A. R. K. Gollakota, A. K. Thandlam, and C. Shu, “Biomass to Bio Jet Fuels: A Take Off to the Aviation Industry,” *Liq. Biofuels*, pp. 183–213, May 2021.
- [16] M. D. Staples *et al.*, “Lifecycle greenhouse gas footprint and minimum selling price of renewable diesel and jet fuel from fermentation and advanced fermentation production technologies,” *Energy Environ. Sci.*, vol. 7, no. 5, pp. 1545–1554, 2014.
- [17] E. Budsberg, J. T. Crawford, H. Morgan, W. S. Chin, R. Bura, and R. Gustafson, “Hydrocarbon bio-jet fuel from bioconversion of poplar biomass: Life cycle assessment,” *Biotechnol. Biofuels*, vol. 9, no. 1, pp. 1–13, 2016.
- [18] A. H. Tanzil *et al.*, “Evaluation of bio-refinery alternatives to produce sustainable aviation fuels in a sugarcane mill,” *Fuel*, vol. 321, Aug. 2022.
- [19] K. Cox, M. Renouf, A. Dargan, C. Turner, and D. Klein-Marcuschamer, “Environmental life cycle assessment (LCA) of aviation biofuel from microalgae, *Pongamia pinnata*, and sugarcane molasses,” *Biofuels, Bioprod. Biorefining*, vol. 8, no. 4, pp. 579–593, Jul. 2014.
- [20] R. W. Stratton, H. M. Wong, and J. I. Hileman, “Quantifying variability in life cycle greenhouse gas inventories of alternative middle distillate transportation fuels,” *Environ. Sci. Technol.*, vol. 45, no. 10, pp. 4637–4644, 2011.
- [21] S. De Jong *et al.*, “Life-cycle analysis of greenhouse gas emissions from renewable jet fuel production,” *Biotechnol. Biofuels*, vol. 10, p. 64, 2017.
- [22] R. E. Bailis and J. E. Baka, “Greenhouse gas emissions and land use change from *Jatropha curcas* -based jet fuel in Brazil,” *Environ. Sci. Technol.*, vol. 44, no. 22, pp. 8684–8691, 2010.
- [23] G. Seber, R. Malina, M. N. Pearlson, H. Olcay, J. I. Hileman, and S. R. H. Barrett, “Environmental and economic assessment of producing hydroprocessed jet and diesel fuel from waste oils and tallow,” *Biomass and Bioenergy*, vol. 67, pp. 108–118, 2014.
- [24] D. R. Shonnard, L. Williams, and T. N. Kalnes, “Camelina-derived jet fuel and diesel: Sustainable advanced biofuels,” *Environ. Prog. Sustain. Energy*, vol. 29, no. 3, pp. 382–392, Oct. 2010.
- [25] P. Suresh *et al.*, “Life Cycle Greenhouse Gas Emissions and Costs of Production of Diesel and Jet Fuel from Municipal Solid Waste,” *Environ. Sci. Technol.*, vol. 52, no. 21, pp. 12055–12065, Nov. 2018.
- [26] B. Riazi, M. Karanjikar, and S. Spatari, “Renewable Rubber and Jet Fuel from Biomass: Evaluation of Greenhouse Gas Emissions and Land Use Trade-offs in Energy and Material Markets,” *ACS Sustain. Chem. Eng.*, vol. 6, no. 11, pp. 14414–14422, Nov. 2018.
- [27] Y. E. Sorunmu *et al.*, “Fuels and Chemicals from Equine-Waste-Derived Tail Gas Reactive Pyrolysis Oil: Technoeconomic Analysis, Environmental and Exergetic Life Cycle Assessment,” *ACS Sustain. Chem. Eng.*, vol. 5, no. 10, pp. 8804–8814, Oct.



2017.

- [28] Y. Elkasabi, V. Wyatt, K. Jones, G. D. Strahan, C. A. Mullen, and A. A. Boateng, “Hydrocarbons Extracted from Advanced Pyrolysis Bio-Oils: Characterization and Refining,” *Energy and Fuels*, vol. 34, no. 1, pp. 483–490, Jan. 2020.
- [29] E. I. Fitriasaki, W. Won, and J. Jay Liu, “Sustainability assessment of biojet fuel produced from pyrolysis oil of woody biomass,” *Sustain. Energy Fuels*, pp. 3625–3636, 2023.
